# Supplementary material
Source: publisher figshare collection journal article supplement (https://sage.figshare.com/ndownloader/files/30853251)
Supplement: Supplementary file 1 [file 30853251]

**Satisfaction Survey**

Dear Sir/Madam,

Thank you for participating in this research project. Please help fill out the following questionnaire and hand them over to the staff after the class. Your valuable opinions will become our reference for planning and handling classes in the future. Thank you for your cooperation!

Part A. About the Tai Chi class/exercise class

1. Did you enjoy participating in Tai Chi class/exercise class?

□ Not enjoying at all □ Quite enjoy □ Very enjoyable

1. Please choose the appropriate score according to your enjoyment of Tai Chi class/exercise class (1 is the least enjoyable, 5 is the most enjoyable)

□ 1 (Least enjoyable) □ 2 □ 3 □ 4 □ 5 (Most Enjoyable)

1. Will you recommend the Tai Chi class/exercise class to other patients?

□ Never □ Maybe not □ Possibly □ Absolutely

1. Did the Tai Chi class/exercise class improve your overall health?

□ Not at all □ A little bit □ Quite useful　□ Very useful

If it does, how did it improve your health? __________________________

1. During the Tai Chi class/exercise class, did you feel uncomfortable because of the class?

□ Yes □ No

If yes, please describe: _______________________________

1. What is your satisfaction with the Tai Chi class/exercise class as a whole?

□ Very satisfied □ Satisfied □ Acceptable □ Dissatisfied □ Very dissatisfied

Other comments:

　 ________________________________________________________________________

＿＿＿＿＿＿＿＿＿＿＿＿＿＿＿＿＿＿＿＿＿＿＿＿＿＿＿＿＿＿＿＿＿＿＿＿

＿＿＿＿＿＿＿＿＿＿＿＿＿＿＿＿＿＿＿＿＿＿＿＿＿＿＿＿＿＿＿＿＿＿＿＿

*Please turn to the next page*

Please select an appropriate answer for the following questions and you need to answer all of them:

| Part B. The logistics of Tai Chi class/exercise class  Your satisfaction with: | Very satisfied | Satisfied | Acceptable | Dissatisfied | Very dissatisfied |
| --- | --- | --- | --- | --- | --- |
| 1. Instructions of the coach | □ | □ | □ | □ | □ |
| 2. Attitude of the staff | □ | □ | □ | □ | □ |
| 3. Class content design | □ | □ | □ | □ | □ |
| 4. Class schedule | □ | □ | □ | □ | □ |
| 5. Classroom venue (location) arrangement | □ | □ | □ | □ | □ |
| 6. Frequency of the class | □ | □ | □ | □ | □ |
| 7. Overall, what is your satisfaction with study logistics as a whole? | □ | □ | □ | □ | □ |
| Other comments:  ＿＿＿＿＿＿＿＿＿＿＿＿＿＿＿＿＿＿＿＿＿＿＿＿＿＿＿＿＿＿＿＿＿＿＿＿＿＿＿  ＿＿＿＿＿＿＿＿＿＿＿＿＿＿＿＿＿＿＿＿＿＿＿＿＿＿＿＿＿＿＿＿＿＿＿＿＿＿＿ | | | | | |
| Part C. Data collection | Very satisfied | Satisfied | Acceptable | Dissatisfied | Very dissatisfied |
| 1. Satisfaction with the data collection process | □ | □ | □ | □ | □ |
| Other comments:  ＿＿＿＿＿＿＿＿＿＿＿＿＿＿＿＿＿＿＿＿＿＿＿＿＿＿＿＿＿＿＿＿＿＿＿＿＿＿＿  ＿＿＿＿＿＿＿＿＿＿＿＿＿＿＿＿＿＿＿＿＿＿＿＿＿＿＿＿＿＿＿＿＿＿＿＿＿＿＿ | | | | | |

This is the end of the questionnaire.

Thank you for your reply!
